# Supplementary material
Source: MDPI journal article supplement (https://www.mdpi.com/1424-2818/15/6/789)
Supplement: s1 [file s1]

**Supplementary Table S1.** Collected location of social wasp nests.

| Nest No.                  | Host (Social wasp)                | Coordinate             | Location                                                  |
|---------------------------|-----------------------------------|------------------------|-----------------------------------------------------------|
| 1. <i>Pyralis regalis</i> |                                   |                        |                                                           |
| 1                         | <i>Dolichovespula kuami</i>       | N37.754193 E127.165267 | Korea National Arboretum, Jikdong-ri, Soheul-eup, Pocheon |
| 2                         | <i>D. kuami</i>                   | N35.488541 E126.907700 | Naejangsan National Park, Naejang-dong, Jeongeup          |
| 3                         | <i>D. kuami</i>                   | N36.590997 E128.794788 | Sanyari, Waryong-myeon, Andong                            |
| 4                         | <i>Vespa crabro flavofasciata</i> | N35.221024 E128.555608 | Hoewon-dong, Hoewon-gu, Masan                             |
| 5                         | <i>V. crabro flavofasciata</i>    | N36.983778 E129.379500 | Eupnam-ri, Uljin-eup, Uljin                               |
| 6                         | <i>V. simillima simillima</i>     | N36.663732 E128.686215 | Dochon-ri, Bukhu-myeon, Andong                            |
| 7                         | <i>V. simillima simillima</i>     | N36.653307 E128.614760 | Jaepum-ri, Seohu-myeon, Andong                            |
| 8                         | <i>V. velutina nigrithorax</i>    | N35.252093 E127.591643 | Jirisan National Park, Naedong-ri, Toji-myeon, Gurye      |
| 9                         | <i>V. velutina nigrithorax</i>    | N36.558192 E128.757949 | Yongsang-dong, Andong                                     |
| 10                        | <i>V. velutina nigrithorax</i>    | N36.545543 E128.711913 | Susang-dong, Andong                                       |
| 11                        | <i>V. velutina nigrithorax</i>    | N36.587900 E128.693993 | Noha-dong, Andong                                         |
| 12                        | <i>V. velutina nigrithorax</i>    | N36.483830 E128.660002 | Wonho-ri, Iljik-myeon, Andong                             |
| 13                        | <i>V. ducalis</i>                 | N36.373469 E128.648468 | Cheolpari, Uiseong-eup, Uiseong                           |
| 14                        | <i>V. analis parallela</i>        | N36.661773 E128.902863 | Jeongsan-ri, Yean-myeon, Andong                           |
| 15                        | <i>V. dybowskii</i>               | N36.513671 E128.552957 | Ingeumyeon, Pungcheon-myeon, Andong                       |
| 16                        | <i>V. mandarinia</i>              | N36.719149 E128.426621 | Yulgok-ri, Eunpung-myeon, Yecheon                         |
| 17                        | <i>V. mandarinia</i>              | N36.552556 E128.530883 | Hahoe-ri, Pungcheon-myeon, Andong                         |
| 18                        | <i>V. mandarinia</i>              | N36.365248 E128.659360 | Cheolpari, Uiseong-eup, Uiseong                           |
| 19                        | <i>V. mandarinia</i>              | N36.365391 E128.658835 | Cheolpari, Uiseong-eup, Uiseong                           |

|                                  |                                   |                        |                                       |
|----------------------------------|-----------------------------------|------------------------|---------------------------------------|
| 20                               | <i>P. rothneyi koreanus</i>       | N36.665065 E128.511064 | Miho-ri, Bomun-myeon, Yecheon         |
| 21                               | <i>P. rothneyi koreanus</i>       | N36.656417 E128.488727 | Sinwol-ri, Bomun-myeon, Yecheon       |
| 22#                              | <i>P. rothneyi koreanus</i>       | N36.137071 E128.611283 | Geummae-ri, Hyoryeong-myeon, Gunwi    |
| 23                               | <i>P. rothneyi koreanus</i>       | N36.136370 E128.611911 | Geummae-ri, Hyoryeong-myeon, Gunwi    |
| 24                               | <i>P. rothneyi koreanus</i>       | N36.136518 E128.610816 | Geummae-ri, Hyoryeong-myeon, Gunwi    |
| 25                               | <i>P. rothneyi koreanus</i>       | N36.137409 E128.612058 | Geummae-ri, Hyoryeong-myeon, Gunwi    |
| 26                               | <i>P. yokahamae</i>               | N35.964583 E128.928913 | Changgu-dong, Yeongcheon              |
| 27                               | <i>P. nipponensis</i>             | N35.909365 E128.069238 | Yeongcheon-ri, Geumsu-myeon, Seongju  |
| 2. <i>Anatrachyntis japonica</i> |                                   |                        |                                       |
| 28                               | <i>P. rothneyi koreanus</i>       | N36.136732 E128.611672 | Geummae-ri, Hyoryeong-myeon, Gunwi    |
| 29                               | <i>P. rothneyi koreanus</i>       | N36.137071 E128.611283 | Geummae-ri, Hyoryeong-myeon, Gunwi    |
| 30                               | <i>P. rothneyi koreanus</i>       | N36.539990 E128.691703 | Suha-dong, Andong                     |
| 31                               | <i>P. rothneyi koreanus</i>       | N36.665057 E128.510551 | Miho-ri, Bomun-myeon, Yecheon         |
| 32                               | <i>P. rothneyi koreanus</i>       | N36.611849 E128.692528 | Songsongcheon-ri, Seohu-myeon, Andong |
| 33                               | <i>Vespa crabro flavofasciata</i> | N36.121306 E128.644948 | Hwagye-ri, Hyoryeong-myeon, Gunwi     |
| 3. <i>Hypsopygia mauritialis</i> |                                   |                        |                                       |
| 34                               | <i>P. rothneyi koreanus</i>       | N35.198170 E127.463695 | Bongseo-ri, Gurye-eup, Gurye          |
| 35                               | <i>P. rothneyi koreanus</i>       | N35.829107 E127.060648 | Jungdong Deokjin-gu, Jeonju           |
| 36                               | <i>P. rothneyi koreanus</i>       | N35.909365 E128.069238 | Yeongcheon-ri, Geumsu-myeon, Seongju  |
| 37                               | <i>V. velutina nigrithorax</i>    | N35.186895 E128.164149 | Galjeon-ri, Geumsan-myeon, Jinju      |

|    |                                |                        |                                  |
|----|--------------------------------|------------------------|----------------------------------|
| 38 | <i>V. velutina nigrithorax</i> | N35.186895 E128.164149 | Galjeon-ri, Geumsan-myeon, Jinju |
|----|--------------------------------|------------------------|----------------------------------|
